# Supplementary material for: Characterization and comparative genomic analysis of virulent and temperateBacillus megateriumbacteriophages
Source: PeerJ journal article supplement (doi:10.7717/peerj.5687), 2018-12-10

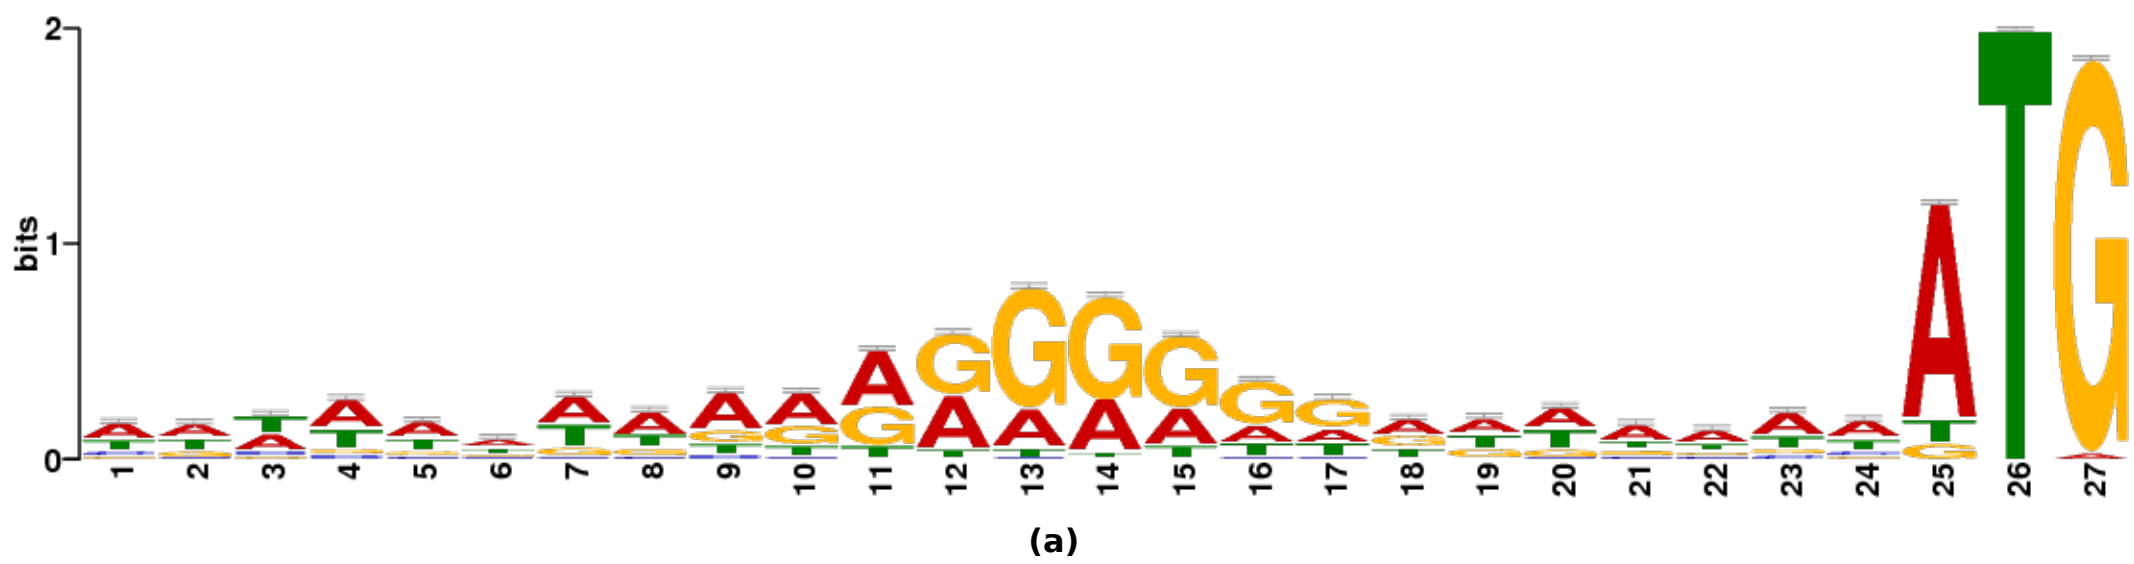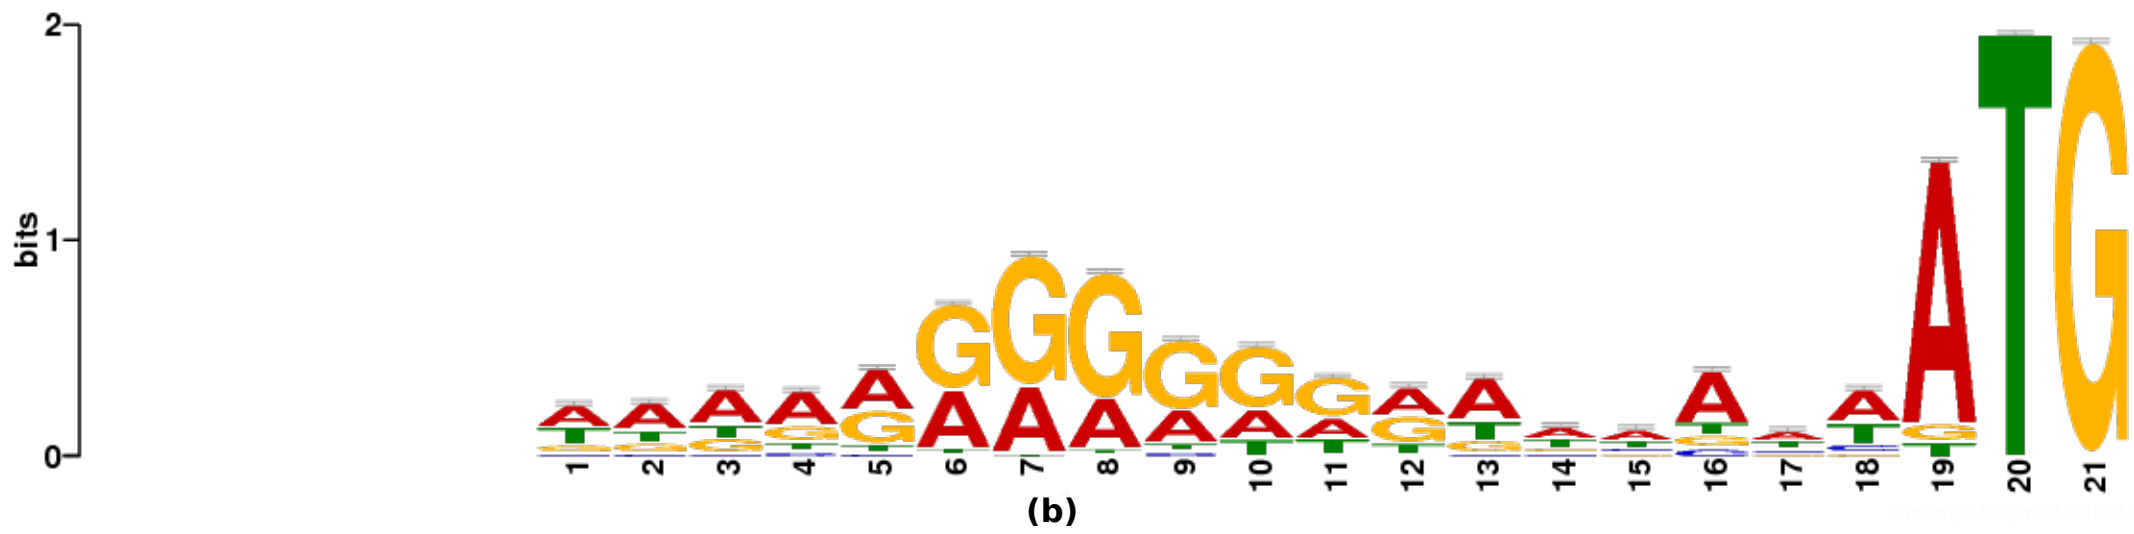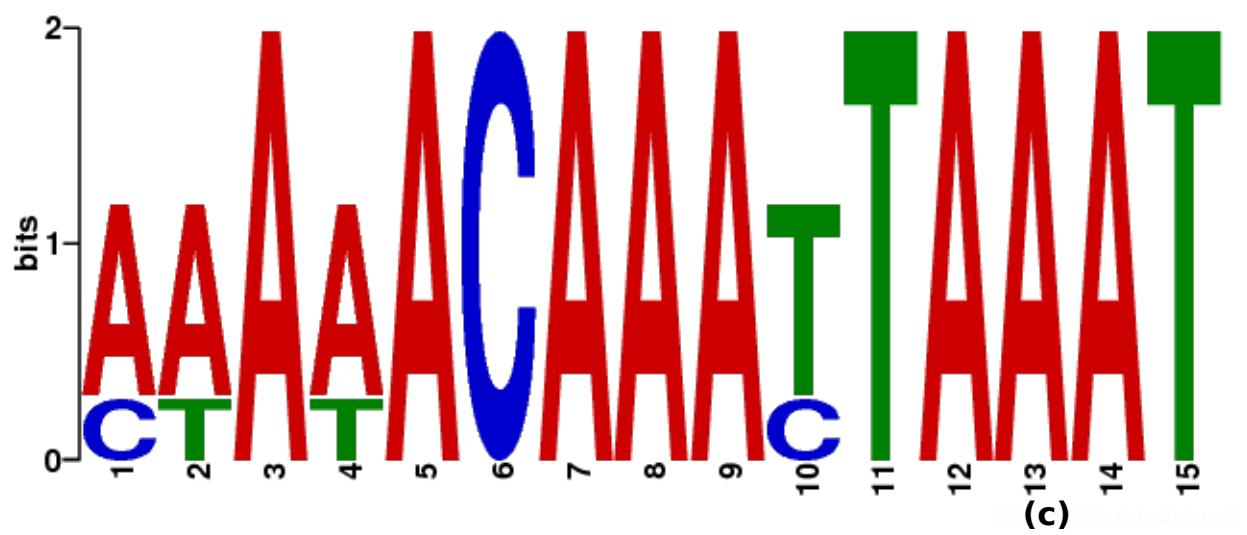

Supplement: Fig._S1.pdf [file Fig._S1.pdf]
