# Supplementary material for: Characterization and comparative genomic analysis of virulent and temperateBacillus megateriumbacteriophages
Source: PeerJ journal article supplement (doi:10.7717/peerj.5687), 2018-12-10
Supplement: Plaq._photos.pdf [file Plaq._photos.pdf]

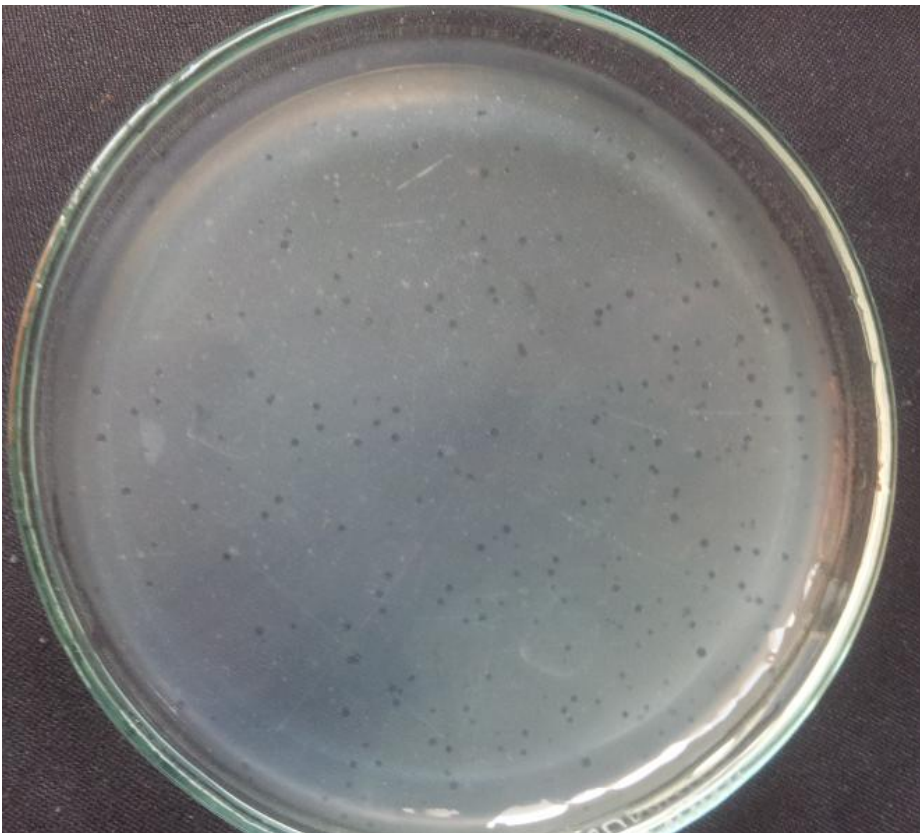

BM5

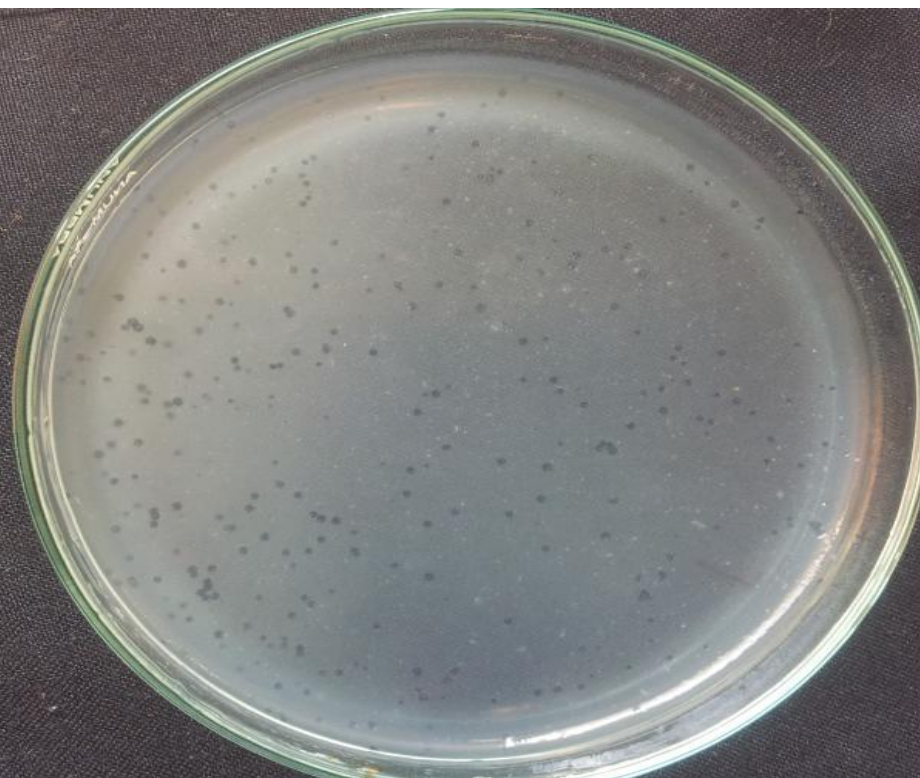

BM10
