# Supplementary material for: Characterization and comparative genomic analysis of virulent and temperate Bacillus megaterium bacteriophages
Source: PeerJ. 2018 Dec 10;6:e5687. doi: 10.7717/peerj.5687 (PMC6292376; doi:10.7717/peerj.5687)
Supplement: Table S3 — Identified phage-RNA polymerase (RNP) promoters, location and sequence in BM5 phage genome. [file peerj-06-5687-s003.xlsx]

## Sheet: BM5
RNP promoters	Location		Sequence
BM5_1	175..212		TTTTGCTAATAACGGTGAAACAGTAGATATTAGTGATG
BM5_2	423..460		TAGGATATATAAAACTATTTAAGGGGCTGTTATGAATG
BM5_3	1275..1312		TTAGCTACATAAGTGCAATGAGGGAAGGTGAAAACATG
BM5_4	1730..1767		GAATGAGCACAGTTAATATAAATCTCTCCAAGAAAATG
BM5_5	3200..3237		TTATTAATTGGTAAACATTCAGAGGGGGAAATCAAATG
BM5_6	3382..3419		TTTATTGACGCGTTTAAGGCTAATGGTGTTGAAGTATG
BM5_7	3768..3805		GAGTGGCTAAATGGAGCGCCGAAGGAGGTTAAATAATG
BM5_8	5750..5787		TTTTCCCAACCATAGGAAAAGGAGTGTTTTTATTTATG
BM5_9	6540..6577		CACCTCATTCTAATTAAAAGGGAGTGCATGAGCACATG
BM5_10	7570..7607		CGCTCCTATTTAATTTAAAATTGGAGGGTTTACACATG
BM5_11	7959..7996		TGTGGCTTTTTTTAAAAAGAAAAGGAGTGAAATAAATG
BM5_12	10011..10048		CTAATAAAATATATCTTCTACAAAGGAGTGAAAACATG
BM5_13	10051..10088		CCTAGAAGAAGCAAAAAAAAAGAGCGCTCGGCCTTATG
BM5_14	10603..10640		TAGATACGATATTCTTTATTTAAGGAGGGGTATAGATG
BM5_15	11052..11089		ATTGGACAGCAGCAATAGAAGCGGCGTTAAGCGAAATG
BM5_16	12599..12636		TAATTGAATTAAGGCTTAAAAAGGGAGGAAAAACAATG
BM5_17	14060..14097		TTGAAGTCTTTTGTATGGGGTAAGGAGGGGCTTATATG
BM5_18	15965..16002		TTAAGTATCAAAACTATGTAAAGTAGGTGGTATGAATG
BM5_19	16874..16911		TTGCAATGCAATAACATTAGAAAGGTGGTTATAGAATG
BM5_20	18256..18293		TCCGTATCAGTACGCCATTCGCGCAAGTTGATAGCTTG
BM5_21	19112..19149		CCCTAAAGTAATGCAATATAGATAGGGGGATTTGAATG
BM5_22	19416..19453		AAGAAAAGGCTAAAAAACAAGGACGGGGCGGCGCTATG
BM5_23	24061..24098		ACGTGCCGCCGGTTCACTTAACTAGGAGGAAGTTCATG
BM5_24	24320..24357		ATTTCCCTGCTTTTTTTATTGGGGAGGTAATTAAAATG
BM5_25	24537..24574		GATTAAAGAAATTCGCGAAAAGGTGGAGAGTTGAAATG
BM5_26	complement(25481..25518)		TGTAAGATTGAGGATCTATATGAGGAGGAAAAATAATG
BM5_27	complement(25675..25712)		TTAAAAGAGACAGAATATATATACTAGGTGATGTTATG
BM5_28	25927..25964		GTGTTTTTACTCAAAAATCATTAAGGGGGATGTCTATG
BM5_29	26333..26370		ATTTTCACACATTATAAAACTTGGAGGTTATGAAAATG
BM5_30	27501..27538		ACCGGGAAATGCTGATACTTTCGAAATTGGATGAAATG
BM5_31	complement(29592..29629)		TAGATTTAATATATCTTTAATTGGAGAGGTTTAAAATG
BM5_32	complement(30313..30350)		CTCCTAGTTAAACTAAATTAAAGGAGGTGTACGCTGTG
BM5_33	30470..30507		AAAAGCAAACGAGATACAGAAAGGGAGTTGGACAGATG
BM5_34	30866..30903		AGTCCTAAATCATCTATAAAAGGGGAGTAGCAAAAATG
BM5_35	31071..31108		GTATGAAAGTTCATTATTGAAAGGAGCTGTTGAACATG
BM5_36	31249..31286		GCAGTTCATTATTCCAGAGGAAGGAGAAATTTTATATG
BM5_37	31888..31925		AATCTATATTTTATCACATAATGGAGGTTTTATACATG
BM5_38	32048..32085		AAAAAGTAAGAGAAGAACTTGCAGAACGTTGCATTATG
BM5_39	32616..32653		TTAACGCGCTCTCTTATAAAAGGGGGACAAGAGGCATG
BM5_40	32726..32763		TATGTTGTGAACTTCTATAAAAAGGAGCTAGGGGAATG
BM5_41	33034..33071		AAAAGAAAAATATAAAAACGTGGGGAGAGGTTCAAATG
BM5_42	33733..33770		CTTGGAGACCGTTATTTTAAGGAGGAAATGAAGAAATG
BM5_43	35021..35058		ATGAGCCGCGTATATGCCCATATTGTAAAGAGGTTGTG
BM5_44	35764..35801		AAAATGCTGTTAGAAAATTAAAGGGAGATGGAGAAATG
BM5_45	36361..36398		TGGCAATAGAGCAATTAGAAAAGGGGGTGTAACTGTTG
BM5_46	36546..36583		AGGGAATACGAAGAAACTCTAAGGGGGTAACTGGAGTG
BM5_47	36730..36767		ATGGTTTGAACAATTGAATAGGGGGATTGTTACTGATG
BM5_48	37194..37231		TTCGGTGAGGTTGTAGAAATGGAGGAAGCAAACTAATG
BM5_49	37493..37530		CTTTCTAAAATGCAAGCAGCTCACATGAAAACGTTATG
BM5_50	37848..37885		AAACAGGAATCGAATCAGTTAGCGCGCCTTTAATCATG
BM5_51	38200..38237		TAAATACAAAAAGTTCAGAGAGGAAGCGGAACTCGATG
BM5_52	38483..38520		CATTCTAGCTAACGGTGGAAAGGTAAAGGGATAATATG
BM5_53	38841..38878		GGAAACAAAATTAGACGAGAATGGAGACTTAAAACATG
BM5_54	39638..39675		ATGTTTGATGAAGAATGCGAGGGGATGTGCGGCTTATG
BM5_55	39720..39757		TCAATCTATTTTTGAGATATTAGGAGGAAAATATAATG
BM5_56	40246..40283		GTGGACATATCAAAATAGAAAAGGAGTTTTTAAAAATG
BM5_57	40527..40564		CCTTAGTTTTTTATAAAGGGGGTGTGGCAACCGGGATG
BM5_58	40898..40935		AAATCAAAATTAATACAAGCATTGAGTGAAACGTCATG
BM5_59	42632..42669		CAGGTTGGTTGAATAACTAGGAAGGAGGTGTACATATG
BM5_60	43209..43246		CTAAAACAAAAAATAACTTTATGAGTGGTAAGTATATG
BM5_61	43794..43831		GTCAGCAAAATAAATTAAAAGGAGGTGATGAATAAGTG
BM5_62	44359..44396		ACAAAGAAAACGTAACTTAAAGGAGAGATTGAAGAATG
BM5_63	45552..45589		GCAGGCGCATAATCCTTGTGAAAGGGTGATTGAACATG
BM5_64	45721..45758		ACGCAAAGTCCCTTTGATTGAAGAAGTTGAAGACAATG
BM5_65	46001..46038		TCATAACCGAGCTATTCAGAAAGCAGGTACTCCTGATG
BM5_66	46321..46358		ATTTGTCGTGCTTATGGAAGTGAGTTGATTTCATAATG
BM5_67	46692..46729		ATGGCGCAAGTATACCGTAAGGAATTAGCGAAACTATG
BM5_68	47047..47084		TTATGTTTTAAAACAACAAATGGAGGTATTGCCAAATG
BM5_69	47770..47807		AAAGGTGAGTATTTTTATATAAGGGAGTGAATGTATTG
BM5_70	48134..48171		TATTAATTCTTCAGTAAATGGAGAAGGTGTATCTTATG
BM5_71	50081..50118		TAGTAATCAATAATATAGTAGAGGATGCGGTAGGTTTG
BM5_72	50952..50989		TACAACAATCAGTTACTTATTTTTGGGGTGGATCAATG
BM5_73	51184..51221		ACAGGGCGTGTTTTTATTTTGAGGAGGAAACAAACATG
BM5_74	51566..51603		CGACTCAACAACTGGATAACTTCTATAAACACCTTATG
BM5_75	51731..51768		ACCAAGTGCCAGGTTGGTAGAGGAGGTGGACATACATG
BM5_76	56529..56566		AATAGCATCTTATAATGGAAGGATGGGGATAAAATTTG
BM5_77	57372..57409		ATCGCTTTTACTATTTCTAAGGAGGAGGTGAGCGATTG
BM5_78	59683..59720		ACGCTGTTGGTTACGTGGATAAAGGAGTGAATAACGTG
BM5_79	59978..60015		CACCCCAGAAAATTAACAAAGAGAGGTGATATACCTTG
BM5_80	62278..62315		AGAGAAGGCTTATTTTATACAAAGGGGTGAGAACCATG
BM5_81	62565..62602		ATTATCTTCACTGTGTTCAAGGGAGGAAGCTAAAAATG
BM5_82	62867..62904		TTTTCATATAACTAAAATTCGAGAGGAAGATGAACATG
BM5_83	complement(64600..64637)		GTTACTATAGGCTTAGTTGAAAGGACCGGTGCAAATTG
BM5_84	complement(64912..64949)		CTAAATAAGCGAATAATTAAAATAGGTGATTGAAAATG
BM5_85	65082..65119		ACAGGATTCGCCTAGAATTACAAAAGGAGTGTTAGATG
BM5_86	complement(65586..65623)		GATTGGAACTTCCTGATTAGAACATTTTGGAGAGAATG
BM5_87	65405..65442		TGGCTTATCCAACAATTTAATAAGGGGGAATATGAATG
BM5_88	65698..65735		TGCAACTATATTCTTTTTCTATAGGAGGTTTTAATGTG
BM5_89	66966..67003		TTATCCTCTCTTCGATGTCCCCATATTTGAATCATATG
BM5_90	complement(68277..68314)		TTGCTCTTTTTGTTTCTAAAGGAGAAAGTATATTAATG
BM5_91	complement(69337..69374)		ACTGGATATTTTATAAAGTCCTAATTGAAACAGGTATG
BM5_92	complement(69953..69990)		ATTCATCTTGAATAACTTGAAAGGAGATTTAATTTATG
BM5_93	complement(70383..70420)		AAACAAATATCGTAAATAGAGAGAGGATTATATTTATG
BM5_94	complement(70861..70898)		ATAACAGGAATATTGATAGAGGAGAATGAGAGAAAATG
BM5_95	71010..71047		GTTCCTAAAATGGAACGAGAGGTGGTGATCTAAAAATG
BM5_96	71267..71304		GAACATAAAATAATAAGTTAAGGTGGTGATACCCGATG
BM5_97	71555..71592		AACAACCAATTAACTAAAAAGGGTGGTTAGTTGATATG
BM5_98	72020..72057		GGAAAATAATTCAATAGAGAAGGGATGTTCTATACATG
BM5_99	72575..72612		CTGCAAGCTTGAGCTTCAAAGTGGAGGTGTAAGTCATG
BM5_100	73504..73541		GATAGATTAAAAGTTTTTAAAACTAAGGAGGAAAAATG
BM5_101	74005..74042		ATGAAGGCTCCCTTTTCAAAAGGGAGTAATTATAAATG
BM5_102	76712..76749		CTTCGATAACCCTTTTTAGAAAAAGTGGTGATTATATG
BM5_103	77150..77187		AACGTGCGATGTCGTACTTTAAAGGGGGCTAATTGATG
BM5_104	77686..77723		TATATGGCACGCGAGTTATTAAAAGGAGGTTGGCTATG
BM5_105	77873..77910		TCAAAAAATAAAATAATATGAAATGAGGAAACCGTATG
BM5_106	78363..78400		GGGAGCTTCGGCTCCTTGTAATTGGAGGGGAAAAGGTG
BM5_107	79188..79225		GTATGTGTGGAGTTTAGAAATTGGAGGGATAAGGGATG
BM5_108	79497..79534		GCGATTTTTATAAAGTGAAGGGTGGGAATTGAAAAATG
BM5_109	79924..79961		CGTATTTACATTTTAGCACAGGAGGGAGATCCAAGGTG
BM5_110	80517..80554		AGAGAGCGTTCCTTAGTCGTAGGGGCGCTTTTGTTATG
BM5_111	80851..80888		TTTGAACCATAATTAGTTCGAAAGGAGTAGGTCGAATG
BM5_112	81833..81870		TAGGTTGAACTTATTTTTGTGGAGGTGAGCCATTTATG
BM5_113	82141..82178		GTTAGCTATTGTGATCAGTGCAAGGAGAGTGAGACATG
BM5_114	83459..83496		ATAAAATTAACTTAAACAAAGGGAGATGTTGAGATATG
BM5_115	84031..84068		TAATATTCTGACAATTTAAAAGGAGATGTTTATATATG
BM5_116	84223..84260		AATATTAAAACTACTATATAAAGGGGCTGTCTATTATG
BM5_117	84573..84610		ATTGTCAACTACTATACATAAGGGAGCTGGTATATATG
BM5_118	complement(85160..85197)		CTAAACTTAATAGCAGCTATGGCGGGTTTATTTGAATG
BM5_119	complement(85315..85352)		TAATATAAAGGTATAACAAAGAGGAGGTAATACATATG
BM5_120	complement(85653..85690)		ATCACACGATTATACTACTGGGAGGAGGATGACGAATG
BM5_121	complement(85844..85881)		TAGGAAACCGATACTGGTGATAAGGAGAGATACATATG
BM5_122	complement(86297..86334)		TCGATTATATGTTCATACATTAGGAGGGAATTATAATG
BM5_123	complement(86432..86469)		TAGCGCTCGTAGGGTTAGTAGTAGGAGCCTATAGAGTG
BM5_124	complement(87262..87299)		GAATCAAAACACGGTAGCAGAGAGTGGGTGCCGATGTG
BM5_125	complement(87513..87550)		ACGATTATACTATAGAGAACAATGGGGGAAATAATATG
BM5_126	complement(87685..87722)		CCGGAGGATATTGAAGATGCTGGAGGATGAACAAAATG
BM5_127	complement(87845..87882)		GTGGATAGCGATACTTATTATTGGAGGGACTAAAAGTG
BM5_128	complement(88042..88079)		TACCGAAAGTCCATGCGTATAAAGGAGCTAAAACAATG
BM5_129	complement(88290..88327)		TACATAGATGTTAAGAGAGGGAGGTCATTTAACTAATG
BM5_130	complement(88583..88620)		TATGAGAGTGATTCAAGATTGGAGAGATATTGGGTATG
BM5_131	complement(88849..88886)		CATGCAATTATGATTCGAGAAAAGGGGAATGCGTGATG
BM5_132	complement(89031..89068)		AATGGCAATTATAGCGGTAGGGAGGATGAGTGAGAATG
BM5_133	complement(89224..89261)		AAGATACAAGGAGGATAAGAAGGGAAGGAAGAAACGTG
BM5_134	complement(89327..89364)		GAAAATGGTACCATCTATAAGGAGGTTGGAGATTAATG
BM5_135	complement(89542..89579)		ATTGGCACATAGAAGATTTAATAGGTTTATAGGTTATG
BM5_136	complement(89731..89768)		TTGTATATATGCCGAGGATGAAAGGAGAATTGCTAATG
BM5_137	complement(89987..90024)		TTGTAGTAGAAATGACCAACAAAGGAGAGTAAATTATG
BM5_138	complement(90391..90428)		CACACTTCCGCGCTAAAACGAAAGGATGGTAGACTATG
BM5_139	complement(90652..90689)		GAACATGTAATTAACTTAGGGGAGGACGAGCTATAATG
BM5_140	complement(91305..91342)		AACAGTTAGAAAGAAAATGGAAGGGGAATATTAAAATG
BM5_141	complement(91723..91760)		TAATATAAAGTTATAACAAAGAGGAGGTAATACATATG
BM5_142	complement(92035..92072)		ATTACTATTAAAACATGGAAGTAGAGGGATGAAATATG
BM5_143	complement(92313..92350)		ACAATCGAATCGTATTTAGGAGAGGGAGAATTTTAATG
BM5_144	complement(92654..92691)		GAAGAAGAAATAGCTAATCTTAAGGAGGAAGCATGATG
BM5_145	complement(93232..93269)		GTTTACTAAGAGTATATACAAGGGGGACGAGAATTATG
BM5_146	complement(93643..93680)		CTAGAACATAATGAAAATAAGGAGGCTAACTAATTATG
BM5_147	complement(93858..93895)		AACGGGCAAGTTATTACTAAGGAGGCTAACTAATTATG
BM5_148	complement(94469..94506)		CGAAAAAATAAAATAATAGAAAGAGGTACATAACAATG
BM5_149	complement(94831..94868)		AGGTCTTTATACGGAGTTTGTAGGAGGGGTGCATTTTG
BM5_150	complement(95474..95511)		GCTATGGGTAAACAATTGAACGGGGAGGAAGGGAAATG
BM5_151	complement(96082..96119)		GTAGAGCGTATTTTAAATAGAGAGGGTGAGCTATAATG
BM5_152	complement(96348..96385)		AATGTAGTAATATTAAATCAAGGAGGAGATAAAAAATG
BM5_153	complement(96918..96955)		AGTATTATAAAACTATCGAAAGGAGAGATGAAAGATTG
BM5_154	complement(97361..97398)		GTATGCAATCAATCAAATGATGGGAGCTAAAAATAATG
BM5_155	complement(97506..97543)		TATGATGACATTGTGTATTTCAAGGAGGCGGAATAATG
BM5_156	complement(97625..97662)		AAACGACAATGGATAGTTTTCATGAGGCACTAGTCATG
BM5_157	complement(97984..98021)		ATATTTATACAAAAGTATACAAGGAGGAAAATTAAATG
BM5_158	complement(98575..98612)		GCTCCTGTATCTGTAGGTCTAAAGGAGGAAACTAAATG
BM5_159	complement(99456..99493)		ATACACACGCAATGAGAAGAGGAGATTAATACATAATG
BM5_160	complement(99699..99736)		ATAGTATAATAGGTTACAAGAAGGAGGTGAAAGATATG
BM5_161	complement(101168..101205)		GTTAACATTTAGTAAATAACAAGAGGAGGAATAAAGTG
BM5_162	complement(102169..102206)		AAAAACGAGGTTTAAATAATAGGAGGAAATATAATATG
BM5_163	complement(102900..102937)		AGTAAGGAGTTCAATAAATCTAAAGGAGAATGTTTATG
BM5_164	complement(103407..103444)		TCCAATTAGTTGTTAACAATGCGTAGGAGGTAAACATG
BM5_165	complement(104130..104167)		AGTTGTACCCGCCCGTTGAATACAACATACTACTCGTG
BM5_166	complement(104377..104414)		AGTGGAAATAATGAAGAATACATAGAGGTGAGTAAATG
BM5_167	complement(104734..104771)		TGATGATAAGATAGATTCATAAGGAGGAGATAACGATG
BM5_168	complement(105619..105656)		AGAGTAGTAAATAAAAAATAAGGAGTGGAAGTAGAATG
BM5_169	complement(106208..106245)		GTACAGTAGATAAAAGGAAAGGAAGGGACTAGAAAATG
BM5_170	complement(108065..108102)		ACTAGGTGTCCCGTATTTTGGAGAGGAAGATAGCAATG
BM5_171	complement(108273..108310)		ATAGCTCAGAATGCAGAAAATGAGGGAACATTCTAATG
BM5_172	complement(108692..108729)		CTATCGTGTACTAAAACAGAAAGGGGAACTGCAAGATG
BM5_173	complement(108966..109003)		GTAGACCAGCGCTTCGATGAGGAGCTAGACGATGAATG
BM5_174	complement(109490..109527)		AATACACATACGGAGAAGAAAGGCGGTAAATAGCTATG
BM5_175	complement(109789..109826)		ACCAAAAAATTTCTCAAGTGGAGGTAGAGTAGCCCGTG
BM5_176	109987..110024		CTGCATCCATTCTTCATCGAGGTATAATTTTTCGTTTG
BM5_177	110166..110203		CTAACAACGAACAAAGGAGAAAGGGGGAGGAAAAAATG
BM5_178	110550..110587		CATTCAGTAGATAAAAAGAGAAAGGTGGATTGGTCATG
BM5_179	110886..110923		TCAGTTTATCTCAAAAATAAGAAAGGAAGTTGAACATG
BM5_180	complement(111593..111630)		TAGAAAAGAAAAATAGAGCCGTGGAGGGAAAATAAGTG
BM5_181	complement(111881..111918)		CAACAAATAAAACGAAAAGGAGTGTCAAAATAAAGATG
BM5_182	112838..112875		CTTAGTACTATATTAATAAATAGGGTGTGGTTTTATTG
BM5_183	113146..113183		TTCCCTATTTTATTTGAATAGAAGGTGGAATGCAAATG
BM5_184	115055..115092		GTTACTATCGTACCACTTAGAAAGGAGGAATGCACTTG
BM5_185	115868..115905		CATTTTATTCGAAATCCAGAAAGGAGCAATAATTAATG
BM5_186	116986..117023		ATAAAATACATATACTAGAAAGGAAGAATTAATAAATG
BM5_187	118663..118700		TTATTTCAAAAAATACGATATAAAGGAGATTTATTATG
BM5_188	118912..118949		ATAAAGAAGAAAAATAATAGGGAGTAGGGTTGTGTATG
BM5_189	119800..119837		TTAACTTAGGAATTATTTAAGAGAGGAGGTAGAGTATG
BM5_190	120588..120625		GGATTAAACGGGTTCTTCAAAGGGATTGGTTAAGAATG
BM5_191	121243..121280		GAACGGTGTTTAGAGTTTAGAAAGGAGGAGAAAATTTG
BM5_192	122134..122171		ATAGTAAATTCAATTAATAGATTGGAGGTTTCATAGTG
BM5_193	122375..122412		AAAATAAACATACATAGGAAAGGAAGATTACATATATG
BM5_194	124140..124177		TCTACTAAAATTTAATAATAGGAGTGAATGAATATATG
BM5_195	124655..124692		AAGCTATGTATACTAAAAGTAAAGGAGGAGATAATATG
BM5_196	124822..124859		AATAACCCTAGATTCACATAAAAGGAGGAGATAATATG
BM5_197	125091..125128		ACGTTTACAATTACACAAATCAAGGAGGAATTGAAATG
BM5_198	125706..125743		TTATATTATATGTATGTTCAGAAAGGAGTGAAGTCATG
BM5_199	128220..128257		AGCAATACAAATATAATGTAGAGGAGAACGAATTAATG
BM5_200	128948..128985		TACTAAAGTTATCAAATGACAAGGAGATGCATAAAATG
BM5_201	129749..129786		TATATTATTAATAGATAACTTAGGAGGCAAGGAAAATG
BM5_202	130236..130273		CTCGTACTCCTTATATGCGAAACCTTTGGGCGCTAATG
BM5_203	130853..130890		TACTTTTCTTTAAGTAAAAAGGATGGTGAGGGAACTTG
BM5_204	134842..134879		GTCCCTCTCTTCTTTTTAAATAAGGAGGTTTAACAATG
BM5_205	134955..134992		GGTTATATGTTATTTAGCTAGAAAGGAGGAACATCATG
BM5_206	137264..137301		TGTTATAATATAAAAAAGGGAGGATGATTATTAGTATG
BM5_207	143394..143431		AACCGTTAAATAGAATCGACTGGAGGAAAATTAGAATG
BM5_208	146107..146144		AAGACAATATAAAACACTATAAGGGAGAAATGACAATG
BM5_209	146621..146658		CTGGGAGAACTAGTTAATTCATAGGAGGAAAACAAATG
BM5_210	146817..146854		AGAAGTAGAAAATAAAGAATAGGAGGTCTTAAGATATG
BM5_211	147421..147458		AATCAAGATAACTATGGAAGAACGGAGGAACGCACATG
BM5_212	148196..148233		ATTTAATATAGGATACTACGGAAGGTGGGCATAAGATG
BM5_213	148723..148760		GATGTTATTTTAACTGACAGGTTGGAGGTGAGATAGTG
BM5_214	149476..149513		ACTTTTCAAACAATATCCGATAGGCGGTGAAAGCATTG
BM5_215	150533..150570		TATAATTAAAGTAACACTAGTATAGGAGGAATAATATG
BM5_216	153050..153087		TAGATATTAAAAACAAATAATAGGAGTGAAAGCAATTG
BM5_217	156586..156623		GTAACGAAACAGACAGTTTACTAAGGAGGGATTACATG
BM5_218	156864..156901		TGAGATATTTTAACAAATAGGAGGAGTTAATATAGATG
BM5_219	158726..158763		TAACCCTTGTACTAATAGTAAAGGAGTTGTAATTAATG
BM5_220	159636..159673		TGTTTACTAAAACTTATGCAAAGGAGAAGTGGAGTATG
BM5_221	161413..161450		ATATTCTAAAAAACAAGAGGGGGAATTTATGTAATATG
BM5_222	162880..162917		AAGAAATAAATCAAGCAATCAGAGGGGGACAATAATTG
BM5_223	163075..163112		CAAAAGTAGAAAGATTAGTATAAGGGGGAAACTAAATG
BM5_224	163631..163668		TTCTGATACATATCTAGAAAGAGGAGAATATAAATATG
