# Supplementary material for: Characterization and comparative genomic analysis of virulent and temperate Bacillus megaterium bacteriophages
Source: PeerJ. 2018 Dec 10;6:e5687. doi: 10.7717/peerj.5687 (PMC6292376; doi:10.7717/peerj.5687)
Supplement: Table S5 — Iidetified tRNAs numbers, types and integrase presence in Bacillus phage genomes. [file peerj-06-5687-s005.xlsx]

## Sheet: Sheet1
Phage name	Integrase	No. of tRNAs	Types of tRNAs
Eldridge_Myo_megaterium	-	0
Silence_Sipho_megaterium	-	0
Moonbeam_Myo_megaterium	-	3	TRNA-Ser	tRNA-Asn	tRNA-Trp
Mater_Myo_megaterium	+	5	TRNA-Gly	TRNA-Glu	TRNA-Asn	tRNA-Thr	tRNA-Asp
BM5_Myo_megaterium	+	0
BM10_Myo_megaterium	-	17	tRNA-Cys, tRNA-Asn, tRNA-Gly, tRNA-Thr, tRNA-Asp, tRNA-Glu, tRNA-Arg, tRNA-Gln, tRNA-His, tRNA-Pro, tRNA-Phe, tRNA-Ile, tRNA-Met, 2 tRNA-Ser and 2 tRNA-Leu
Palmer_Podo_megaterium	-	0
Slash_Sipho_megaterium	+	0
G_Myo_megaterium	-	8	tRNA-Cys	tRNA-Asp	tRNA-Phe	tRNA-Tyr	tRNA-Glu	tRNA-Thr	tRNA-Ser	tRNA-Trp
Page_Podo_megaterium	-	0
Pony_Podo_megaterium	-	0
Pookie_Podo_megaterium	-	0
Pascal_poppyseed_Podo_megaterium	-	0
poppyseed_Podo_megaterium	-	0
Staley_Sipho_megaterium	+	0
Stahl_Sipho_megaterium	+	0
Stills_Sipho_megaterium	+	0
SalinJah_Myo_thuringiensis	-	0
Belinda_Myo_thuringiensis	+	3	tRNA-Asn	tRNA-Glu	tRNA-Asp
DIGNKC_Myo_thuringiensis	-	3	tRNA-Asn	tRNA-Glu	tRNA-Asp
Nemo_Myo_thuringiensis	-	0
Nigalana_Myo_thuringiensis	-	0
NotTheCreek_Myo_thuringiensis	-	0
Phrodo_Myo_thuringiensis	-	0
SageFayge_Myo_thuringiensis	-	0
Zuko_Myo_thuringiensis	-	3	tRNA-Asn	tRNA-Glu	tRNA-Asp
Kida_Myo_thuringiensis	-	0
DirtyBetty_Myo_thuringiensis	-	0
TsarBomba_Myo_thuringiensis	-	20	tRNA-Cys tRNA-Asn 2tRNA-Ser tRNA-Gly tRNA-Thr tRNA-Asp tRNA-Glu 2tRNA-Ile tRNA-Arg tRNA-Gln tRNA-His tRNA-Pro TRNA-Phe tRNA-Tyr 2tRNA-Leu tRNA-Trp tRNA-Met
vB_BtS_BMBtp3_Sipho_thuringiensis	+	0
Waukesha92_Sipho_thuringiensis	-	0
Bobb_Myo_thuringiensis	-	9	tRNA-Met	tRNA-Trp	tRNA-His	tRNA-Gly	2tRNA-Phe	3TRNA-Asn
Riley_Myo_thuringiensis	-	0
Evoli_Myo_thuringiensis	-	8	tRNA-Asn	tRNA-Gln	tRNA-Trp	2tRNA-Ser	tRNA-Asp	tRNA-Leu	tRNA-Tyr
Megatron_Myo_thuringiensis	-	0
CAM003_Myo_thuringiensis	-	8	tRNA-Asn	tRNA-Gln	tRNA-Trp	2tRNA-Ser	tRNA-Asp	tRNA-Leu	tRNA-Tyr
Hoody_T_Myo_thuringiensis	-	8	tRNA-Asn	tRNA-Gln	tRNA-Trp	2tRNA-Ser	tRNA-Asp	tRNA-Leu	tRNA-Tyr
Hakuna_Myo_thuringiensis	-	0
phiCM3_Sipho_thuringiensis	+	0
Spock_Myo_thuringiensis	+	0
BigBertha_Myo_thuringiensis	-	0
Troll_Myo_thuringiensis	-	0
BMBtp2_Sipho_thuringiensis	-	0
phIS3501_Sipho_thuringiensis	+	1	tRNA-Met
BtCS33_Sipho_thuringiensis	+	0
IEBH_Sipho_thuringiensis	-	0
0305phi8_36_Mayo_thuringiensis	-	0
Bp8p_C_Myo_pumilus	-	5	tRNA-Met	tRNA-His	tRNA-Gly	tRNA-Phe	tRNA-Asn
Blastoid_Sipho_pumilus	-	0
Riggi_Sipho_pumilus	-	0
Glittering_Sipho_pumilus	-	0
Finn_Sipho_pumilus	-	0
Eoghan_Sipho_pumilus	-	0
Curly_Sipho_pumilus	-	0
phiAGATE_Myo_pumilus	-	4	tRNA-Met	tRNA-Glu	tRNA-Phe	tRNA-Asn
Fah_Sipho_anthracis	-	0
Wbeta_Sipho_cereus	-	0
Gamma_Sipho_cereus	-	0
BCJA1c_Sipho_clarkii	+	0
SP15_Myo_subtilis_licheniformis	-	0
AR9_Myo_subtilis	+	0
Grass_Myo_subtilis	-	3	tRNA-Ser	tRNA-Asn	tRNA-Gln
CampHawk_Myo_subtilis	-	2	tRNA-Asn	tRNA-Ser
phiNIT1_Myo_subtilis	+	4	tRNA-Ser	tRNA-Asn	tRNA-Gln	tRNA-Asp
SP10_Myo_subtilis	-	0
PfEFR5_Sipho_cereus	+	0
JL_Myo_cereus	-	4	tRNA-Met	tRNA-Lys	tRNA-Tyr	tRNA-Trp
Shanette_Myo_cereus	-	3	tRNA-Met	tRNA-Tyr	tRNA-Trp
AvesoBmore_Myo_cereus	-	0
250_Sipho_cereus	-	0
Eyuki_Myo_cereus	-	0
BCP8_2_Myo_cereus	-	18	tRNA-Met 2tRNA-Leu tRNA-Ile tRNA-Tyr tRNA-Phe tRNA-Pro tRNA-His tRNA-Gln 2tRNA-Ser tRNA-Arg tRNA-Glu tRNA-Gly tRNA-Thr tRNA-Asp tRNA-Asn tRNA-Cys
JBP901_Myo_cereus	-	19	TRNA-Met 2tRNA-Ile tRNA-Tyr tRNA-Leu tRNA-Phe tRNA-Pro tRNA-His tRNA-Gln 2tRNA-Ser tRNA-Arg 2tRNA-Asp TRNA-Thr tRNA-Glu tRNA-Gly tRNA-Asn tRNA-Cys
CP51_Myo_cereus	-	0
vB_BceM_Bc431v3_Myo_cereus	+	21	tRNA-Met tRNA-Trp 2tRNA-Leu 2tRNA-Ile tRNA-Tyr tRNA-Phe tRNA-Pro tRNA-His tRNA-Gln 2tRNA-Ser tRNA-Arg 2tRNA-Asp tRNA-Glu tRNA-Thr tRNA-Gly tRNA-Asn tRNA-Cys
BCD7_Myo_cereus	-	0
Shbh1_Myo_sp	+	0
vB_BhaS171_Sipho_halmapalus	+	0
Bastille_Myo_cereus	-	7	2tRNA-Asn	tRNA-Trp	2tRNA-Ser	tRNA-Asp	tRNA-Tyr
B4_Myo_cereus	-	0
BPS13_Myo_cereus	+	0
BCP78_Myo_cereus	-	18	tRNA-Met 2tRNA-Leu 2tRNA-Ile tRNA-Tyr tRNA-Phe tRNA-Pro tRNA-His tRNA-Gln 2tRNA-Ser tRNA-Arg tRNA-Glu tRNA-Asp tRNA-Gly tRNA-Asn tRNA-Cys
PBC1_Sipho_cereus	-	0
Deep_Blue_Myo_cereus	-	19	tRNA-Met tRNA-Trp 2tRNA-Leu tRNA-Ile tRNA-Tyr tRNA-Phe tRNA-Pro tRNA-His tRNA-Gln 2tRNA-Ser tRNA-Arg tRNA-Glu tRNA-Thr tRNA-Asp tRNA-Gly tRNA-Asn tRNA-Cys
Bcp1_Myo_cereus	-	0
BPS10C_Myo_cereus	-	0
